# Supplementary material
Source: PubMed Central journal article supplement (PMC8803029)
Supplement: boe-13-1-438-s001.pdf [file boe-13-1-438-s001.pdf]

## Spatially resolved measurements of ballistic and total transmission in microscale tissue samples from 450 nm to 1624 nm: supplement

AARON T. MOK,<sup>1,2,\*</sup>  JAMIEN SHEA,<sup>3</sup> CHUNYAN WU,<sup>1,4</sup>  FEI XIA,<sup>1,2,5</sup>  ROSE TATARSKY,<sup>3</sup> NILAY YAPICI,<sup>3</sup> AND CHRIS XU<sup>1</sup>

<sup>1</sup>*School of Applied and Engineering Physics, Cornell University, NY 14853-3501, USA*

<sup>2</sup>*Meining School of Biomedical Engineering, Cornell University, NY 14853-3501, USA*

<sup>3</sup>*Department of Neurobiology and Behavior, Cornell University, NY 14853-3501, USA*

<sup>4</sup>*College of Veterinary Medicine, Cornell University, NY 14853-3501, USA*

<sup>5</sup>*Present address: Laboratoire Kastler Brossel, ENS-PSL Research University, CNRS, Sorbonne Université, Collège de France, Paris, France*

\*[tm624@cornell.edu](mailto:tm624@cornell.edu)

---

This supplement published with Optica Publishing Group on 21 December 2021 by The Authors under the terms of the [Creative Commons Attribution 4.0 License](https://creativecommons.org/licenses/by/4.0/) in the format provided by the authors and unedited. Further distribution of this work must maintain attribution to the author(s) and the published article's title, journal citation, and DOI.

Supplement DOI: <https://doi.org/10.6084/m9.figshare.17147687>

Parent Article DOI: <https://doi.org/10.1364/BOE.441844>

## Spatially resolved measurements of optical properties in microscale biological samples from 450nm to 1624nm: supplemental document

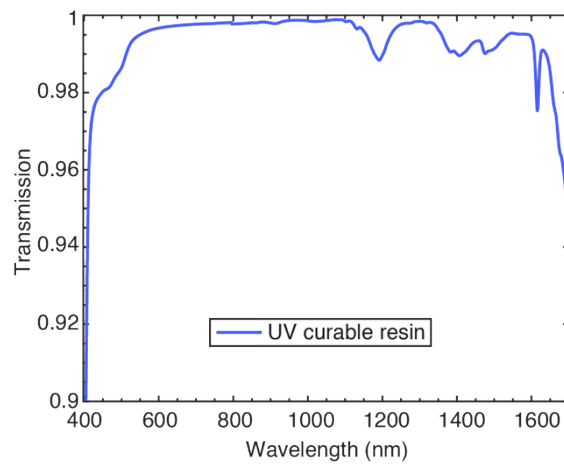

Fig. S1. Transmission measurement of 100- $\mu$ m thick UV curable resin using a commercial spectrophotometer.
